# Supplementary material
Source: PubMed Central journal article supplement (PMC4249560)
Supplement: AAC.03422-14_zac012143533so1.pdf [file AAC.03422-14_zac012143533so1.pdf]

**Supplemental Table S1.** Daptomycin (DAP) MICs, *mprF* single nucleotide polymorphisms (SNPs), surface charge, host defense peptide susceptibilities, and cell wall thickness profiles of the study strains.

| Strains | DAP MICs<br>( $\mu\text{G}/\text{ML}$ ) | <i>mprF</i> SNPs <sup>#</sup> | Surface<br>charge <sup>§</sup> | % survival against<br>tPMPs <sup>‡</sup> |                           | % survival against<br>hNP-1 <sup>‡</sup> |                            | Cell wall<br>thickness (nm) <sup>†</sup> |
|---------|-----------------------------------------|-------------------------------|--------------------------------|------------------------------------------|---------------------------|------------------------------------------|----------------------------|------------------------------------------|
|         |                                         |                               |                                | 2 $\mu\text{g}/\text{ml}$                | 1 $\mu\text{g}/\text{ml}$ | 20 $\mu\text{g}/\text{ml}$               | 10 $\mu\text{g}/\text{ml}$ |                                          |
| G1      | $\leq 0.5$                              | -                             | 87 $\pm$ 13                    | 12                                       | 34                        | 9                                        | 21                         | 19                                       |
| G10     | $\leq 0.5$                              | -                             | 78 $\pm$ 10                    | 33                                       | 41                        | 8                                        | 27                         | 23                                       |
| G12     | $\leq 0.5$                              | -                             | 132 $\pm$ 13                   | 28                                       | 34                        | 28                                       | 49                         | 24                                       |
| G14     | $\leq 0.5$                              | -                             | 129 $\pm$ 17                   | 42                                       | 60                        | 47                                       | 68                         | 27                                       |
| G16     | $\leq 0.5$                              | -                             | 174 $\pm$ 18                   | 13                                       | 17                        | 32                                       | 51                         | 25                                       |
| G34     | $\leq 0.5$                              | -                             | 113 $\pm$ 26                   | 10                                       | 14                        | 13                                       | 30                         | 25                                       |
| G40     | $\leq 0.5$                              | -                             | 148 $\pm$ 16                   | 1                                        | 14                        | 26                                       | 39                         | 25                                       |
| G70     | $\leq 0.5$                              | -                             | 152 $\pm$ 26                   | 1                                        | 0                         | 1                                        | 11                         | 24                                       |
| G71     | $\leq 0.5$                              | -                             | 116 $\pm$ 2.5                  | 4                                        | 10                        | 1                                        | 4                          | 25                                       |
| G72     | $\leq 0.5$                              | -                             | 138 $\pm$ 22                   | 3                                        | 8                         | 8                                        | 16                         | 27                                       |
| G89     | $\leq 0.5$                              | -                             | 194 $\pm$ 13                   | 2                                        | 1                         | 0                                        | 2                          | 22                                       |
| G80     | $\leq 0.5$                              | I498N                         | 105 $\pm$ 8                    | 2                                        | 16                        | 1                                        | 11                         | 25                                       |
| G86     | $\leq 0.5$                              | I498N                         | 93 $\pm$ 15                    | 3                                        | 11                        | 21                                       | 34                         | 28                                       |
| G87     | $\leq 0.5$                              | I498N                         | 208 $\pm$ 15                   | 1                                        | 11                        | 58                                       | 79                         | 26                                       |
| G88     | $\leq 0.5$                              | I498N                         | 141 $\pm$ 30                   | 5                                        | 15                        | 11                                       | 34                         | 29                                       |
| G90     | $\leq 0.5$                              | I498N                         | 105 $\pm$ 18                   | 2                                        | 19                        | 11                                       | 31                         | 26                                       |
|         |                                         |                               |                                |                                          |                           |                                          |                            |                                          |
| G9      | 1                                       | -                             | 86 $\pm$ 18                    | 29                                       | 41                        | 23                                       | 51                         | 25                                       |
| G35     | 1                                       | -                             | 89 $\pm$ 22                    | 22                                       | 26                        | 40                                       | 29                         | 26                                       |
| G38     | 1                                       | -                             | 138 $\pm$ 28                   | 36                                       | 40                        | 50                                       | 67                         | 26                                       |
| G69     | 1                                       | -                             | 127 $\pm$ 24                   | 55                                       | 78                        | 58                                       | 71                         | 27                                       |
| G74     | 1                                       | -                             | 171 $\pm$ 18                   | 8                                        | 21                        | 14                                       | 16                         | 23                                       |
| G94     | 1                                       | -                             | 180 $\pm$ 18                   | 1                                        | 2                         | 0                                        | 0                          | 25                                       |
| G47     | 1                                       | Q692E                         | 190 $\pm$ 35                   | 20                                       | 44                        | 8                                        | 24                         | 23                                       |
| G53     | 1                                       | Q692E                         | 190 $\pm$ 33                   | 55                                       | 78                        | 15                                       | 42                         | 31                                       |
| G56     | 1                                       | Q692E                         | 115 $\pm$ 23                   | 76                                       | 85                        | 47                                       | 64                         | 28                                       |
| G51     | 1                                       | > 30 SNPs                     | 180 $\pm$ 23                   | 23                                       | 48                        | 12                                       | 38                         | 24                                       |
| G66     | 1                                       | > 30 SNPs                     | 87 $\pm$ 32                    | 63                                       | 63                        | 18                                       | 36                         | 25                                       |

|            |          |              |                 |           |           |            |           |           |
|------------|----------|--------------|-----------------|-----------|-----------|------------|-----------|-----------|
|            |          |              |                 |           |           |            |           |           |
| <b>161</b> | <b>4</b> | <b>L826F</b> | <b>90 ± 14</b>  | <b>24</b> | <b>52</b> | <b>71</b>  | <b>73</b> | <b>22</b> |
| <b>165</b> | <b>4</b> | <b>L341S</b> | <b>103 ± 25</b> | <b>16</b> | <b>18</b> | <b>17</b>  | <b>39</b> | <b>19</b> |
| <b>167</b> | <b>4</b> | <b>L826F</b> | <b>100 ± 10</b> | <b>83</b> | <b>99</b> | <b>100</b> | <b>86</b> | <b>22</b> |
| <b>169</b> | <b>4</b> | <b>L826F</b> | <b>105 ± 9</b>  | <b>97</b> | <b>97</b> | <b>56</b>  | <b>80</b> | <b>29</b> |
| <b>212</b> | <b>2</b> | <b>L826F</b> | <b>89 ± 24</b>  | <b>20</b> | <b>45</b> | <b>41</b>  | <b>64</b> | <b>28</b> |
| <b>234</b> | <b>2</b> | <b>L826F</b> | <b>90 ± 22</b>  | <b>31</b> | <b>59</b> | <b>86</b>  | <b>91</b> | <b>25</b> |
| <b>235</b> | <b>3</b> | <b>L341S</b> | <b>77 ± 7</b>   | <b>41</b> | <b>63</b> | <b>38</b>  | <b>48</b> | <b>29</b> |
| <b>333</b> | <b>2</b> | <b>L826F</b> | <b>64 ± 14</b>  | <b>33</b> | <b>39</b> | <b>27</b>  | <b>43</b> | <b>24</b> |

<sup>#</sup>*mprF* SNPs compared to the *mprF* sequences from *S. aureus* Mu50 (CC5).

<sup>§</sup>% cytochrome *c* bound vs *S. aureus* MU50. The higher the amounts of bound cytochrome *c*, the less relative positive surface charge exists.

<sup>¥</sup>Mean % survival of the strains after 2h exposure to host defense peptides (three experimental runs).

<sup>‡</sup>Mean of 100 measurements for each strain.
